# Supplementary material for: Fault interpretation in seismic reflection data: an experiment analysing the impact of conceptual model anchoring and vertical exaggeration
Source: Copernicus journal article supplement (doi:10.5194/se-10-1651-2019), 2019-10-09
Supplement: Supplementary file 1 [file se-10-1651-2019-supplement.pdf]

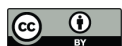

## *Supplement of*

# **Fault interpretation in seismic reflection data: an experiment analysing the impact of conceptual model anchoring and vertical exaggeration**

**Juan Alcalde et al.**

*Correspondence to:* Juan Alcalde ([juan.alcalde@abdn.ac.uk](mailto:juan.alcalde@abdn.ac.uk))

The copyright of individual parts of the supplement might differ from the CC BY 4.0 License.

Thank you for taking part in this experiment. Please complete the following questions and interpret the seismic section on the other side of this page. Please interpret the main faults crossing the section as deep as you can, and a sedimentary horizon to mark the displacement if you can. Further annotation and/or sketching will be very welcomed.

**Gender -** Male ☐ Female ☐

**Age -** <21 ☐ 21-30 ☐ 31-40 ☐ 41-50 ☐ 51-60 ☐ 61+ ☐

**Education -** No degree ☐ Bachelors ☐ Masters ☐ PhD ☐

**What subject(s) were they in?** - Geology ☐ geophysics ☐ maths ☐ engineering ☐  
Other ☐.....

**Experience:**

**How many years of post-education geology and geophysics experience do you have? (Put a number)**

**Where do you work?**

Student ☐ Academic ☐ Consultancy ☐ service company ☐ oil company ☐ other  
☐.....

**Have you worked in other sectors? (Please indicate all that apply)**

Student ☐ Academic ☐ Consultancy ☐ service company ☐ oil company ☐ other  
☐.....

**How often do you interpret seismic image data?**

Daily ☐ weekly ☐ monthly ☐ annually ☐ less frequently ☐ never ☐

**How often do you process seismic data?**

Daily ☐ weekly ☐ monthly ☐ annually ☐ less frequently ☐ never ☐

**What best describes your experience in structural geology?**

Specialist ☐ good working knowledge ☐ basic working knowledge ☐ no knowledge ☐

**What best describes your knowledge in seismic interpretation?**

Specialist ☐ good working knowledge ☐ basic working knowledge ☐ no knowledge ☐

**Have you attended a seismic interpretation course? -- And a structural geology course?**

Yes/no Yes/ no

**Assess the following settings, from 10 (most) to 1 (least), in terms of your experience of working in these tectonic settings. Please rank all relevant.**

Compressional ☐ extensional ☐ inversion ☐ salt/shale ☐ strike-slip ☐

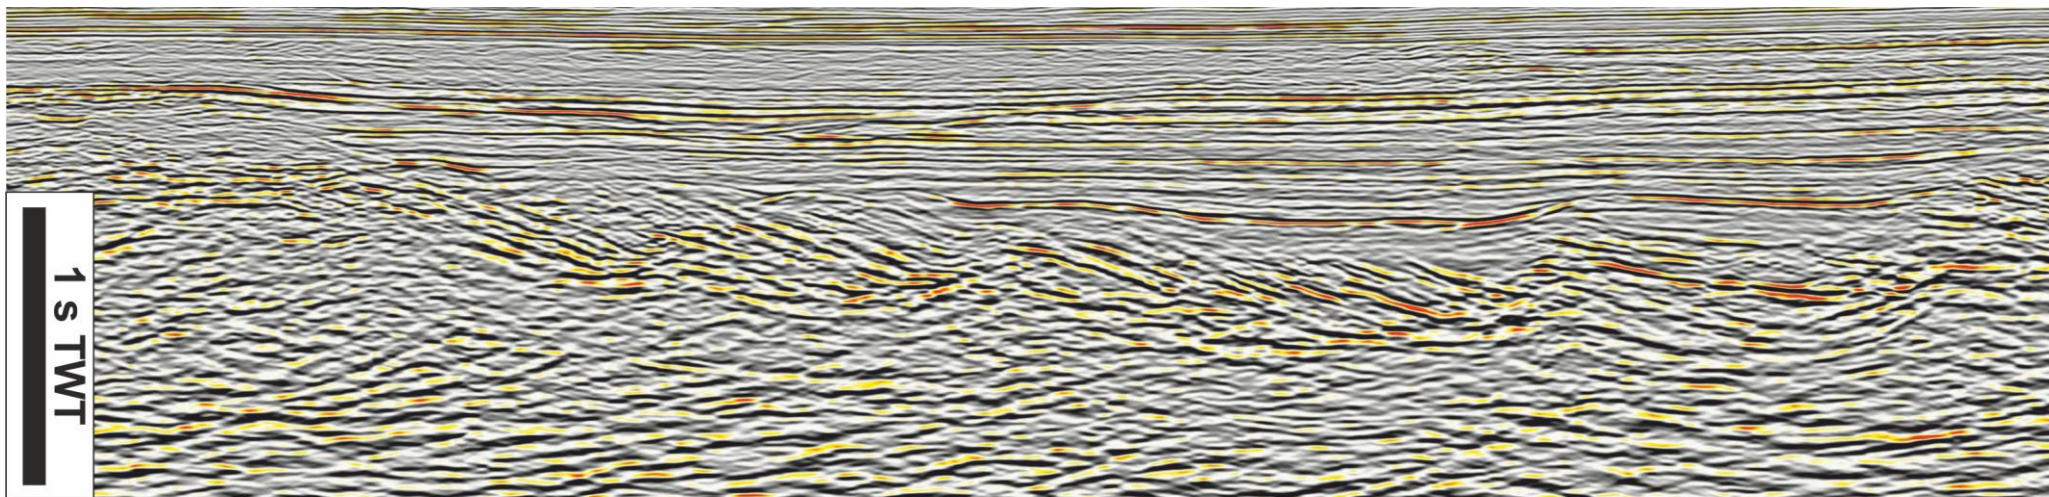

1 s TWT

5 km

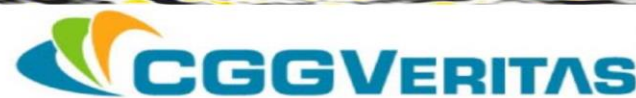

Thank you for taking part in this experiment. Please complete the following questions and interpret the seismic section on the other side of this page. Please interpret the main faults crossing the section as deep as you can, and a sedimentary horizon to mark the displacement if you can. Further annotation and/or sketching will be very welcomed.

**Gender -** Male ☐ Female ☐

**Age -** <21 ☐ 21-30 ☐ 31-40 ☐ 41-50 ☐ 51-60 ☐ 61+ ☐

**Education -** No degree ☐ Bachelors ☐ Masters ☐ PhD ☐

**What subject(s) were they in? -** Geology ☐ geophysics ☐ maths ☐ engineering ☐  
Other ☐ .....

**Experience:**

**How many years of post-education geology and geophysics experience do you have? (Put a number)**

**Where do you work?**

Student ☐ Academic ☐ Consultancy ☐ service company ☐ oil company ☐ other  
☐ .....

**Have you worked in other sectors? (Please indicate all that apply)**

Student ☐ Academic ☐ Consultancy ☐ service company ☐ oil company ☐ other  
☐ .....

**How often do you interpret seismic image data?**

Daily ☐ weekly ☐ monthly ☐ annually ☐ less frequently ☐ never ☐

**How often do you process seismic data?**

Daily ☐ weekly ☐ monthly ☐ annually ☐ less frequently ☐ never ☐

**What best describes your experience in structural geology?**

Specialist ☐ good working knowledge ☐ basic working knowledge ☐ no knowledge ☐

**What best describes your knowledge in seismic interpretation?**

Specialist ☐ good working knowledge ☐ basic working knowledge ☐ no knowledge ☐

**Have you attended a seismic interpretation course? – and/or a structural geology course?**

Yes/no Yes/ no

**Assess the following settings, from 10 (most) to 1 (least), in terms of your experience of working in these tectonic settings. Please rank all relevant.**

Compressional ☐ extensional ☐ inversion ☐ salt/shale ☐ strike-slip ☐



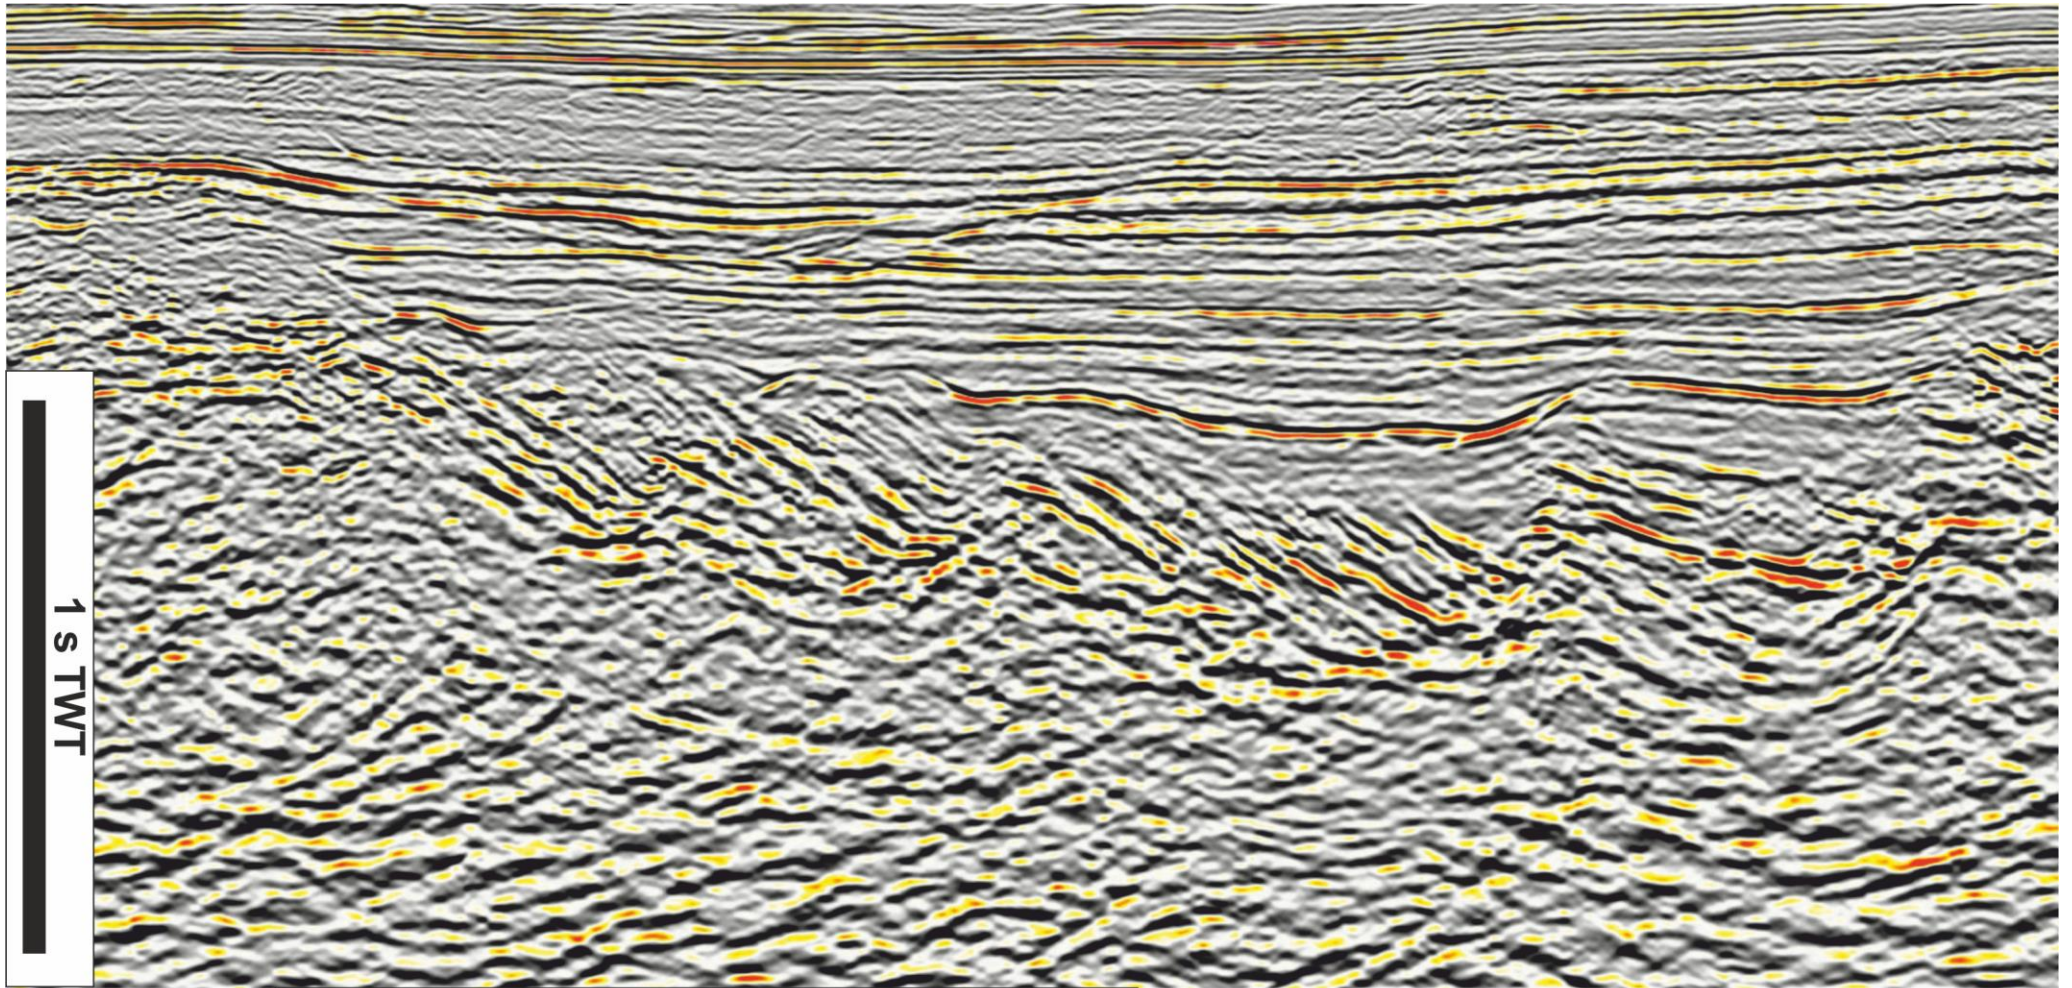

5 km
